# Supplementary material for: Telemonitoring in Long-COVID Patients—Preliminary Findings
Source: MDPI journal article supplement (doi:10.3390/ijerph19095268), 2022-04-26
Supplement: s1 [file s1]

**Table S1.** Advantages and disadvantages of the telemedicine during the COVID-19 pandemic based on previous studies.

| 1. Study                                                                                                                                                                                                                                                                                                                                                                                                     | 2. Advantages                                                                                                                                                                                                                                                                                               | 3. Disadvantages                                                                                                                            |
|--------------------------------------------------------------------------------------------------------------------------------------------------------------------------------------------------------------------------------------------------------------------------------------------------------------------------------------------------------------------------------------------------------------|-------------------------------------------------------------------------------------------------------------------------------------------------------------------------------------------------------------------------------------------------------------------------------------------------------------|---------------------------------------------------------------------------------------------------------------------------------------------|
| 4. 26. Colbert, G.B.; Venegas-Vera, A.V.; Lerma, E.v. Utility of telemedicine in the COVID-19 era. <i>Rev. Cardiovasc. Med.</i> 2020, 21, 583–587. <a href="https://doi.org/10.31083/j.rcm.2020.04.188">https://doi.org/10.31083/j.rcm.2020.04.188</a> . [26]                                                                                                                                                | <ul style="list-style-type: none"> <li>- possibility of contact with a doctor and maintaining social distance, quarantine</li> <li>- medical triage</li> </ul>                                                                                                                                              | <ul style="list-style-type: none"> <li>- limitation of physical examination</li> <li>- no access to imaging and laboratory tests</li> </ul> |
| 5. 27. Hincapié, M.A.; Gallego, J.C.; Gempeler, A.; Piñeros, J.A.; Nasner, D.; Escobar, M.F. Implementation and Usefulness of Tele-medicine During the COVID-19 Pandemic: A Scoping Review. <i>J. Prim. Care Community Health</i> 2020, 11, 2150132720980612. <a href="https://doi.org/10.1177/2150132720980612">https://doi.org/10.1177/2150132720980612</a> . [27]                                         | <ul style="list-style-type: none"> <li>- carrying out the "Forward triage"</li> <li>- reducing the risk of infection</li> <li>- minimizing the use of personal protective equipment</li> </ul>                                                                                                              | <ul style="list-style-type: none"> <li>- inability to assess the patient's nonverbal communication</li> </ul>                               |
| 6. 28. De Albornoz, S.C.; Sia, K.-L.; Harris, A. The effectiveness of teleconsultations in primary care: Systematic review. <i>Fam. Pract.</i> 2022, 39, 168–182. <a href="https://doi.org/10.1093/fampra/cmab077">https://doi.org/10.1093/fampra/cmab077</a> . [28]                                                                                                                                         | <ul style="list-style-type: none"> <li>- lower cost compared to a face to face visit</li> </ul>                                                                                                                                                                                                             | <ul style="list-style-type: none"> <li>- socio-economic barrier</li> <li>- more consultations</li> </ul>                                    |
| 7. 29. Shaker, M.S.; Oppenheimer, J.; Grayson, M.; Stukus, D.; Hartog, N.; Hsieh, E.W.; Rider, N.; Dutmer, C.M.; Vander Leek, T.K.; Kim, H.; et al. COVID-19: Pandemic Contingency Planning for the Allergy and Immunology Clinic. <i>J. Allergy Clin. Immunol. Pract.</i> 2020, 8, 1477–1488.e5. <a href="https://doi.org/10.1016/j.jaip.2020.03.012">https://doi.org/10.1016/j.jaip.2020.03.012</a> . [29] | <ul style="list-style-type: none"> <li>- reducing the exposure of healthcare professionals to potentially infected patients</li> <li>- maintaining social distance</li> <li>- quick assessment of patients for COVID-19 infection</li> <li>- selection of patients' diagnoses and their severity</li> </ul> | <ul style="list-style-type: none"> <li>- traps of virtual care</li> <li>- incorrect medical diagnoses</li> </ul>                            |

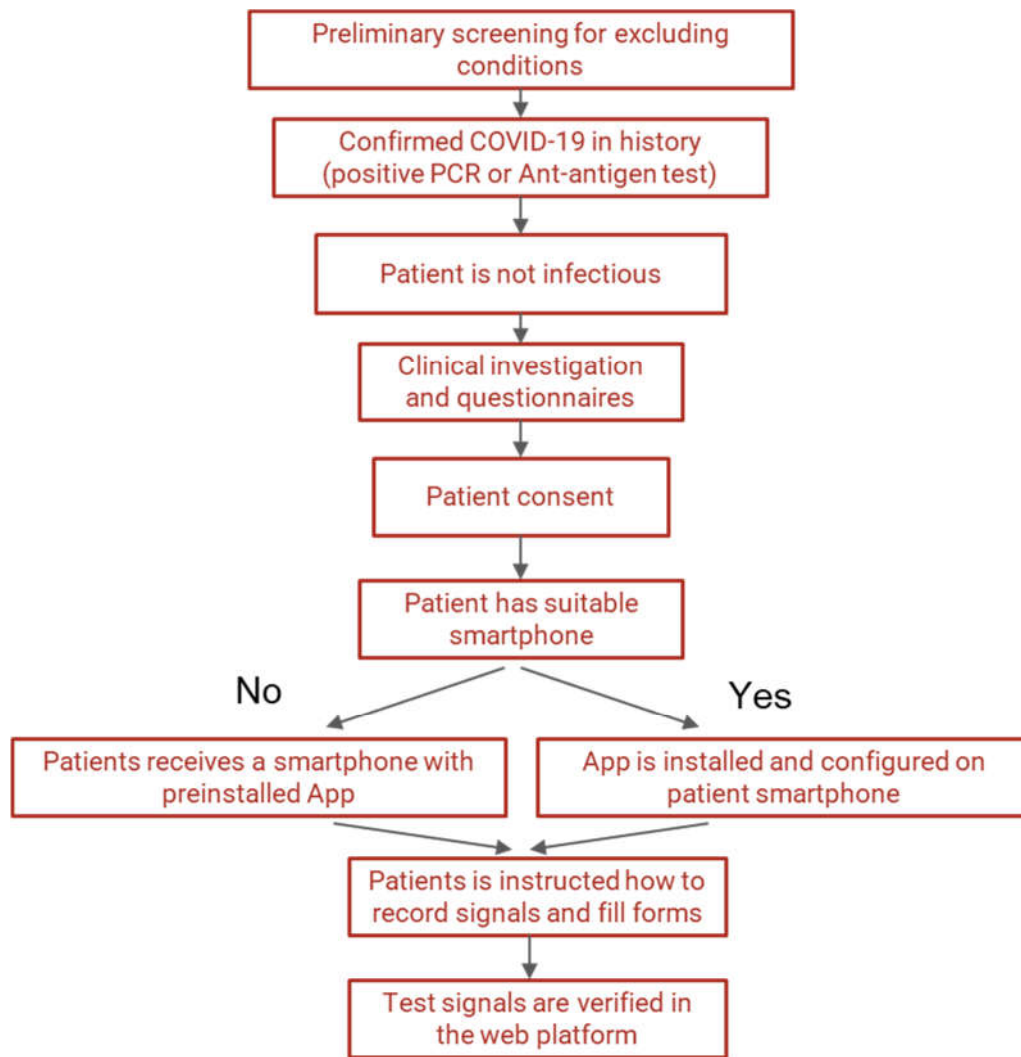

**Figure S1:** Patients flow for Long-COVID cohort of the study.
